# Supplementary material for: Blueberry Consumption Challenges Hepatic Mitochondrial Bioenergetics and Elicits Transcriptomics Reprogramming in Healthy Wistar Rats
Source: PubMed Central journal article supplement (PMC7697217; doi:10.3390/pharmaceutics12111094), 2020-11-14
Supplement: pharmaceutics-12-01094-s001.pdf [file pharmaceutics-12-01094-s001.pdf]

# Supplementary Materials: Blueberry Consumption Challenges Hepatic Mitochondrial Bioenergetics and Elicits Transcriptomics Reprogramming in Healthy Wistar Rats

Sara Nunes, Sofia D. Viana, Inês Preguiça, André Alves, Rosa Fernandes, João S. Teodoro, Artur Figueirinha, Lígia Salgueiro Sara Silva, Ivana Jarak, Rui A. Carvalho, Cláudia Cavadas, Anabela P. Rolo, Carlos M. Palmeira, Maria M. Pintado and Flávio Reis

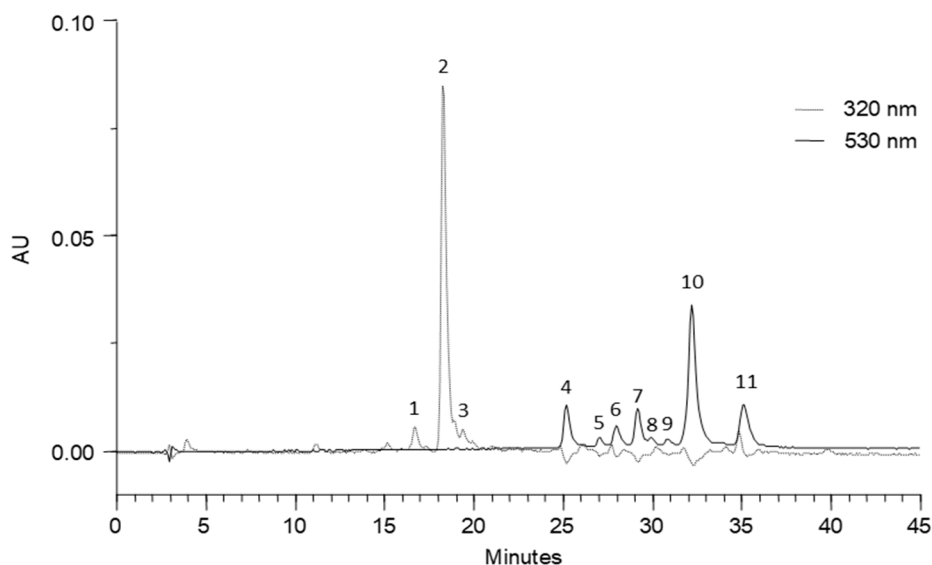

**Figure S1.** Chromatographic profile of phenolic compounds in BJ, obtained with HPLC-PDA (320 / 530 nm).

**Table S1.** Serum metabolites identified by <sup>1</sup>H-NMR.

| Serum metabolites                 | Chemical shift (ppm) | CTRL (n=7)                                        | BJ (n=7)                                          |
|-----------------------------------|----------------------|---------------------------------------------------|---------------------------------------------------|
| Histidine                         | 7.010–7.070          | 0.001 ± 1.15 × 10 <sup>-4</sup>                   | 0.001 ± 1.10 × 10 <sup>-4</sup>                   |
| TGs                               | 5.230 (5.244–5.340)  | 0.010 ± 1.56 × 10 <sup>-3</sup>                   | 0.010 ± 8.72 × 10 <sup>-4</sup>                   |
| Glucose                           | 5.189–5.235          | 0.026 ± 1.13 × 10 <sup>-3</sup>                   | 0.026 ± 8.94 × 10 <sup>-4</sup>                   |
| Mannose                           | 5.149–5.176          | 0.001 ± 5.90 × 10 <sup>-5</sup>                   | 0.001 ± 1.00 × 10 <sup>-4</sup>                   |
| Malic acid                        | 4.261–4.307          | 0.010 ± 1.96 × 10 <sup>-3</sup>                   | 0.014 ± 9.82 × 10 <sup>-4</sup>                   |
| Serine                            | 3.947–3.985          | 0.004 ± 3.86 × 10 <sup>-4</sup>                   | 0.004 ± 3.16e × 10 <sup>-4</sup>                  |
| Glycerol                          | 3.640–3.635          | 0.006 ± 6.35 × 10 <sup>-4</sup>                   | 0.005 ± 3.96 × 10 <sup>-4</sup>                   |
| Glycine                           | 3.538–3.544          | 0.007 ± 8.81 × 10 <sup>-4</sup>                   | 0.007 ± 8.89 × 10 <sup>-4</sup>                   |
| Choline                           | 3.175–3.184          | 0.005 ± 9.86 × 10 <sup>-4</sup>                   | 0.004 ± 7.31 × 10 <sup>-4</sup>                   |
| unknown (DMSO?)                   | 3.124–3.134          | 0.001 ± 1.19 × 10 <sup>-4</sup>                   | 0.001 ± 1.20 × 10 <sup>-4</sup>                   |
| Creatine                          | 3.005–3.023          | 0.003 ± 4.16 × 10 <sup>-4</sup>                   | 0.004 ± 4.22 × 10 <sup>-4</sup>                   |
| Glutamine                         | 2.406–2.457          | 0.016 ± 9.70 × 10 <sup>-4</sup>                   | 0.017 ± 1.29 × 10 <sup>-3</sup>                   |
| Succinate                         | 2.379–2.387          | 0.003 ± 3.92 × 10 <sup>-4</sup>                   | 0.002 ± 4.54 × 10 <sup>-4</sup>                   |
| Acetoacetate/Acetone <sup>a</sup> | 2.195–2.217          | 0.003 ± 5.96 × 10 <sup>-4</sup>                   | 0.003 ± 5.06 × 10 <sup>-4</sup>                   |
| N-acetylproteins                  | 2.004–2.045          | 0.016 ± 9.96 × 10 <sup>-4</sup>                   | 0.017 ± 9.40 × 10 <sup>-4</sup>                   |
| Acetate                           | 1.889–1.904          | 0.003 ± 3.56 × 10 <sup>-4</sup>                   | 0.002 ± 1.20 × 10 <sup>-4</sup>                   |
| Alanine                           | 1.457–1.475          | 0.007 ± 3.93 × 10 <sup>-4</sup>                   | 0.008 ± 4.09 × 10 <sup>-4</sup>                   |
| Lactate                           | 1.292–1.334          | 0.083 ± 8.06 × 10 <sup>-3</sup>                   | 0.073 ± 5.70 × 10 <sup>-4</sup>                   |
| 3-hydroxybutyrate                 | 1.163–1.189          | 0.003 ± 7.42 × 10 <sup>-4</sup>                   | 0.002 ± 3.29 × 10 <sup>-4*</sup>                  |
| Valine                            | 1.004–1.035          | 0.006 ± 2.98 × 10 <sup>-4</sup>                   | 0.006 ± 5.70 × 10 <sup>-4</sup>                   |
| Isoleucine                        | 0.997–1.001          | 4.99 × 10 <sup>-5</sup> ± 8.5 × 10 <sup>-6</sup>  | 4.03 × 10 <sup>-5</sup> ± 8.31 × 10 <sup>-6</sup> |
| TGs (0.87)                        | 0.870 (0.825–0.893)  | 0.010 ± 1.71 × 10 <sup>-3</sup>                   | 0.015 ± 1.66 × 10 <sup>-3</sup>                   |
| Betaine                           | 3.260                | 1.70 × 10 <sup>11</sup> ± 2.34 × 10 <sup>10</sup> | 1.21 × 10 <sup>11</sup> ± 1.47 × 10 <sup>10</sup> |
| Lactate /Alanine                  |                      | 13.190 ± 0.932                                    | 9.800 ± 1.221                                     |
| 3-HB / Acetoacetate               |                      | 1.107 ± 0.124                                     | 0.587 ± 0.072**                                   |

Data are presented as mean ± SEM (n = 5–6/group). \* p < 0.05, \*\* p < 0.01 vs. CTRL group. <sup>a</sup>Putatively annotated as level 3 of identification according to Chemical Analysis Working Group (CAWG) Metabolomics Standards Initiative recommendations. All other metabolites identified as level 2.
